# Supplementary material for: Lithium salt/amide-based deep eutectic electrolytes for lithium-ion batteries: electrochemical, thermal and computational study
Source: Royal Society of Chemistry journal article supplement (doi:10.1039/d0cp01255f), 2020-01-01
Supplement: d0cp01255f1.pdf [file d0cp01255f1.pdf]

## Supporting Information

# Lithium Salt/Amide-Based Deep Eutectic Electrolytes for Lithium Ion Battery: Electrochemical, Thermal and Computational Study

*Hideyuki Ogawa<sup>†‡</sup> and Hideharu Mori<sup>†\*</sup>*

<sup>†</sup> Department of Organic Materials Science, Graduate School of Organic Materials Science, Yamagata University, 4-3-16, Jonan, Yonezawa City, Yamagata Prefecture 992-8510, Japan

<sup>‡</sup> Advanced Technology Research & Development Center, Research & Innovation Promotion Headquarters, Hitachi Chemical Co., Ltd., Wadai 48, Tsukuba City, Ibaraki Prefecture 300-4247, Japan

\* To whom correspondence should be addressed:

email: h.mori@yz.yamagata-u.ac.jp,

Tel.: +81-238-26-3765, Fax: +81-238-26-3092

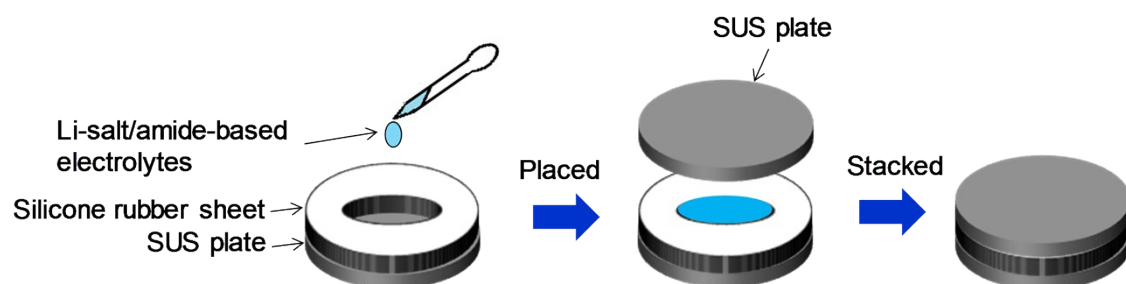

**Figure S1.** Schematic illustrations of preparation of a cell for ionic conductivity measurement.

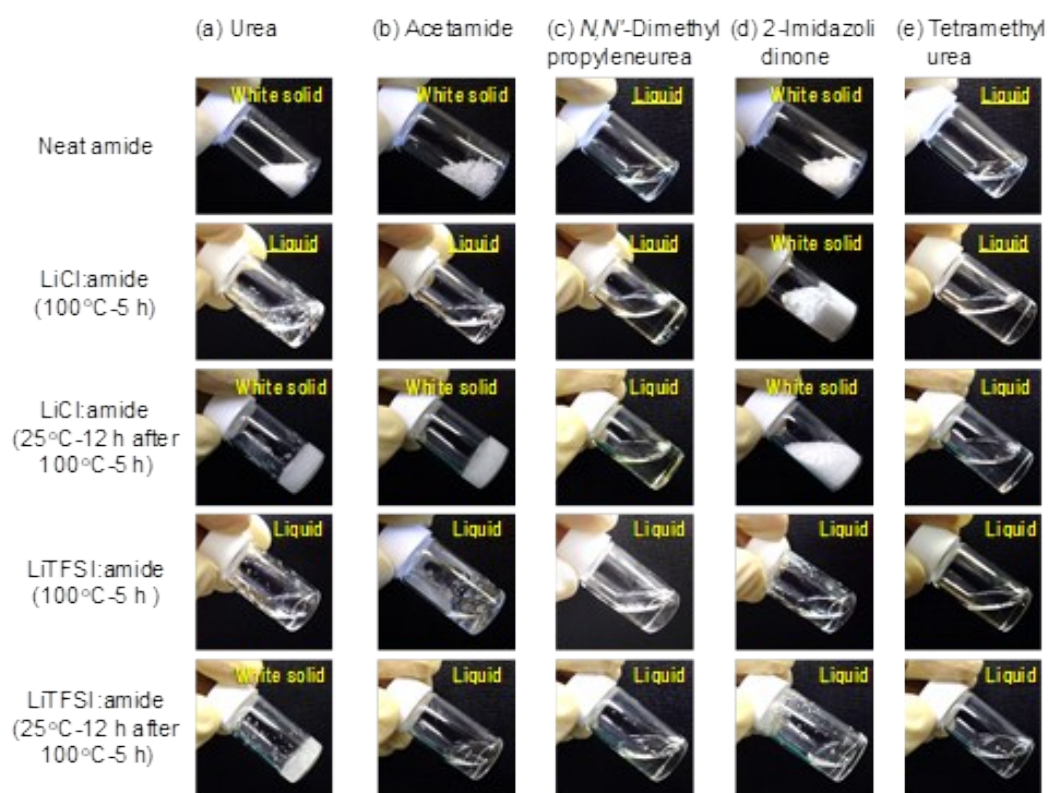

**Figure S2.** The appearances of the neat amides (before heating), LiCl/amide-based electrolytes (i.e. LiCl:amide = 1:5 mol%) and LiTFSI/amide-based electrolytes (i.e. LiTFSI:amide = 1:5 mol%) comprising (a) urea, (b) acetamide, (c) *N,N'*-dimethylpropyleneurea, (d) 2-imidazolidinone and (e) tetramethylurea, respectively. The conditioning temperature is as described in this figure.

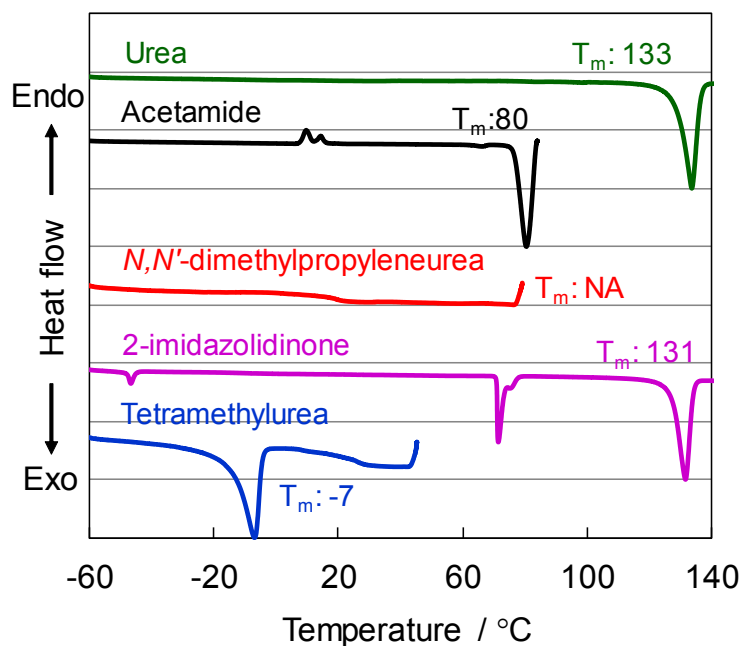

**Figure S3.** DSC curves of the neat amides.

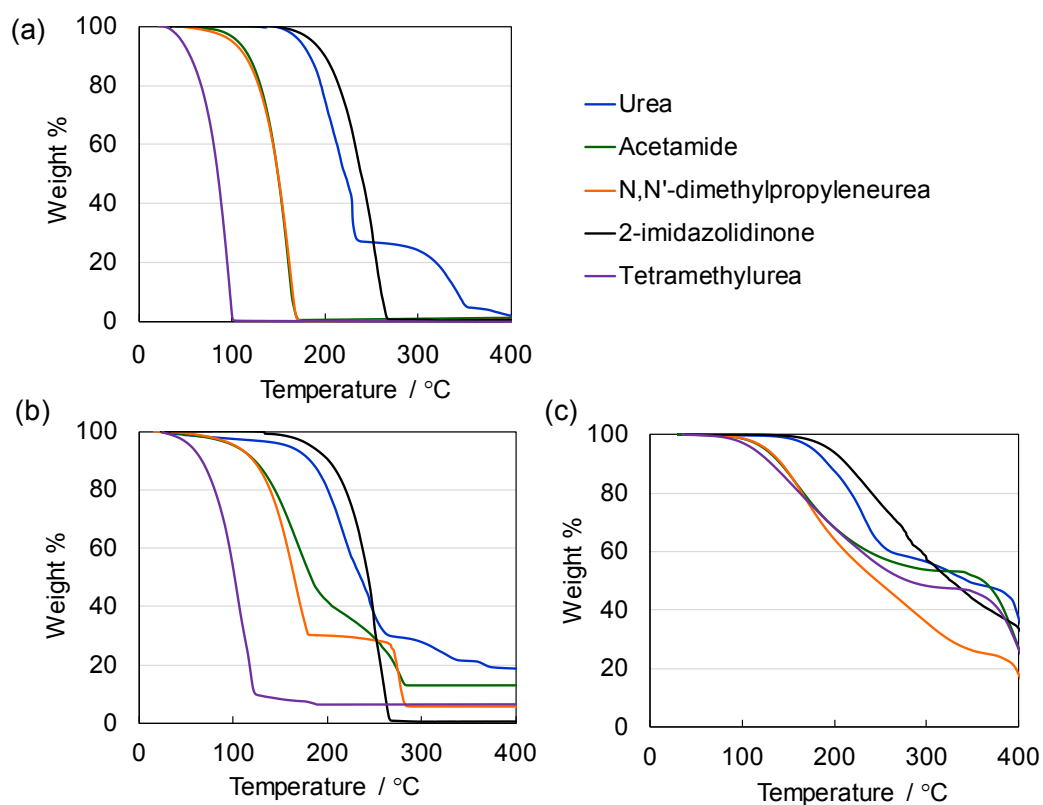

**Figure S4.** TGA curves of (a) neat amides and (b) LiCl/amide based electrolytes (LiCl:amide = 1:5 mol%), (c) LiTFSI/amide based electrolytes (LiTFSI:amide = 1:5 mol%).

**Table S1.** Binding energies (BE) of amides and lithium salts.

| complex                             | BE <sub>sol+Li</sub> [kcal mol <sup>-1</sup> ] | BE <sub>sol+anion</sub> [kcal mol <sup>-1</sup> ] |
|-------------------------------------|------------------------------------------------|---------------------------------------------------|
| Urea + Li <sup>+</sup>              | -60.7                                          | -                                                 |
| Urea + Cl <sup>-</sup>              | -                                              | -26.6                                             |
| Urea + TFSI <sup>-</sup>            | -                                              | -16.7                                             |
| Tetramethylurea + Li <sup>+</sup>   | -65.3                                          | -                                                 |
| Tetramethylurea + Cl <sup>-</sup>   | -                                              | -11.2                                             |
| Tetramethylurea + TFSI <sup>-</sup> | -                                              | -8.6                                              |

**Table S2.** The coordination distance of each atoms from Cl<sup>-</sup> in LiCl/amide-based electrolytes estimated from RDF.

| Sample                          | O in amide | N in amide | H in amide | Li <sup>+</sup> |
|---------------------------------|------------|------------|------------|-----------------|
| LiCl:urea = 1:5 mol%            | 0.34       | 0.34       | 0.24       | 0.23            |
| LiCl:tetramethylurea = 1:5 mol% | 0.35       | 0.35       | 0.26       | 0.23            |

**Table S3.** The coordination distance of each atoms from N<sup>-</sup> in TFSI<sup>-</sup> in LiTFSI/amide-based electrolytes estimated from RDF.

| Sample                            | O in amide | N in amide | H in amide | Li <sup>+</sup> |
|-----------------------------------|------------|------------|------------|-----------------|
| LiTFSI:urea = 1:5 mol%            | 0.51       | 0.32       | 0.23       | 0.20            |
| LiTFSI:tetramethylurea = 1:5 mol% | 0.33       | 0.50       | 0.30-0.62  | 0.20            |

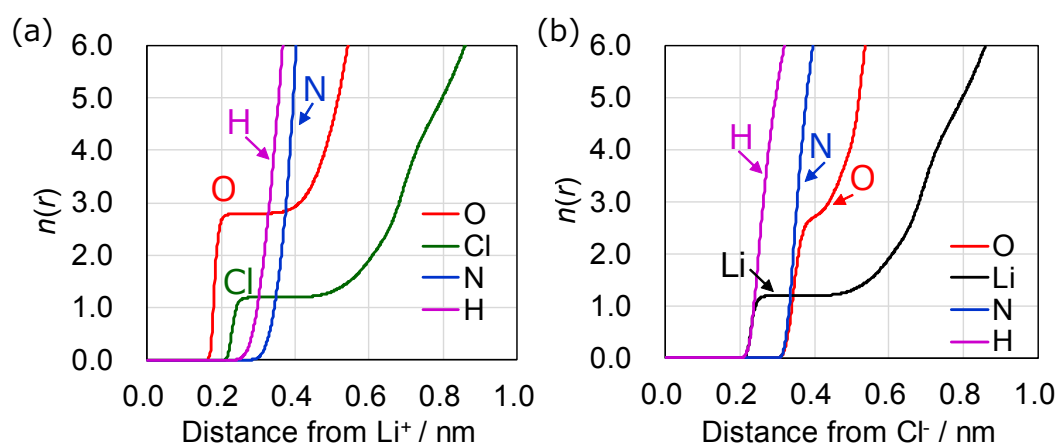**Figure S5.** The coordination number  $n(r)$  of each atoms in LiCl:urea = 1:5 mol% electrolyte around (a) Li<sup>+</sup> and (b) Cl<sup>-</sup>.

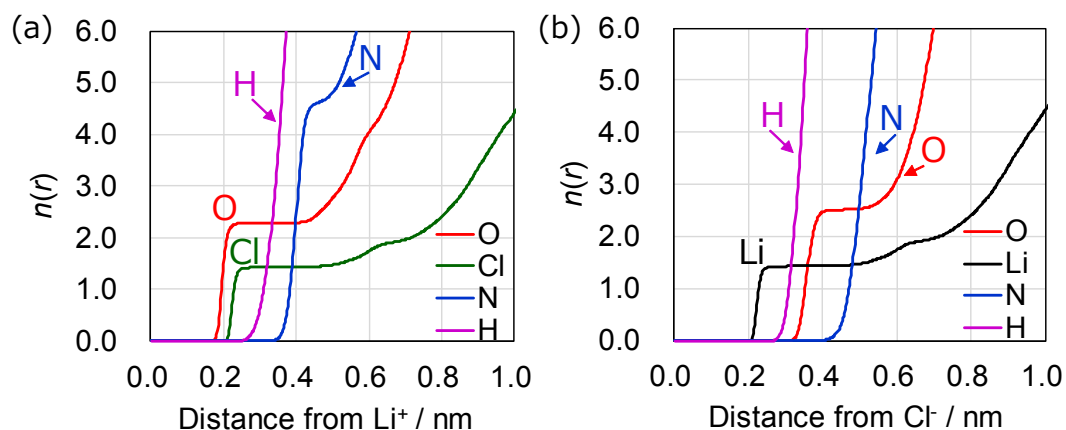

**Figure S6.** The coordination number  $n(r)$  of each atoms in LiCl:tetramethylurea = 1:5 mol% electrolyte around (a)  $\text{Li}^+$  and (b)  $\text{Cl}^-$ .

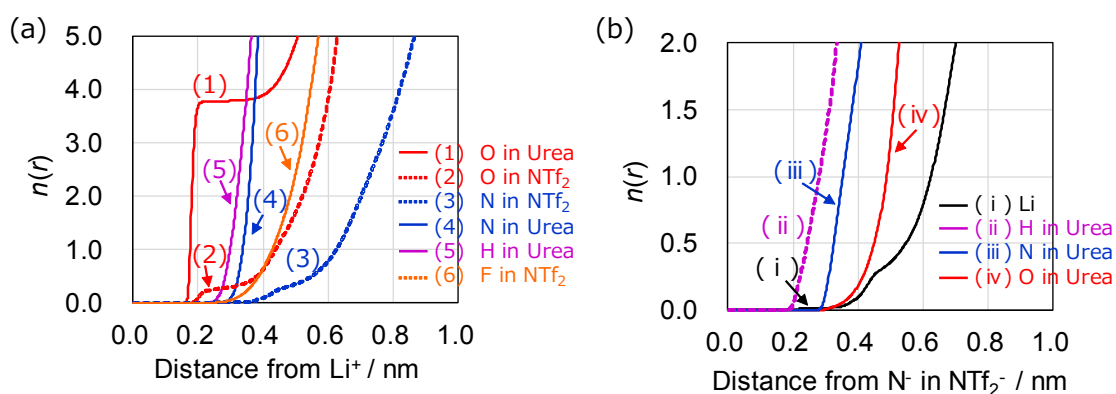

**Figure S7.** The coordination number  $n(r)$  of each atoms in LiTFSI:urea = 1:5 mol% electrolyte around (a)  $\text{Li}^+$  and (b)  $\text{N}^-$  in TFSI $^-$ .

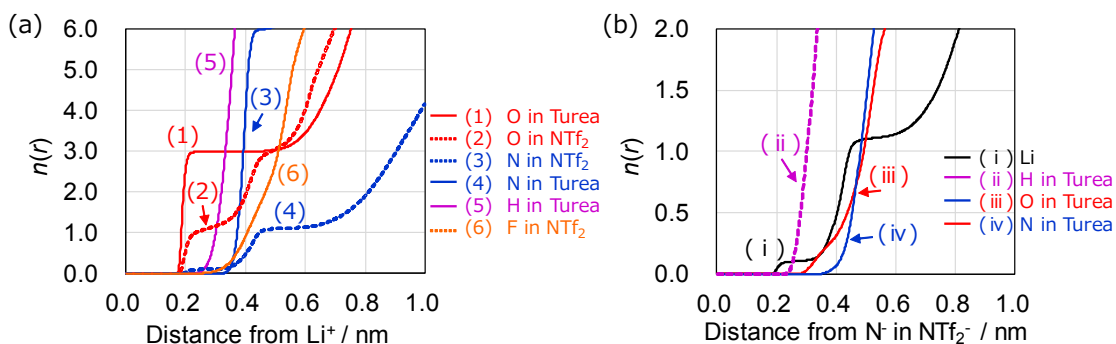

**Figure S8.** The coordination number  $n(r)$  of each atoms in LiTFSI:tetramethylurea = 1:5 mol% electrolyte around (a)  $\text{Li}^+$  and (b)  $\text{N}^-$  in TFSI $^-$ .

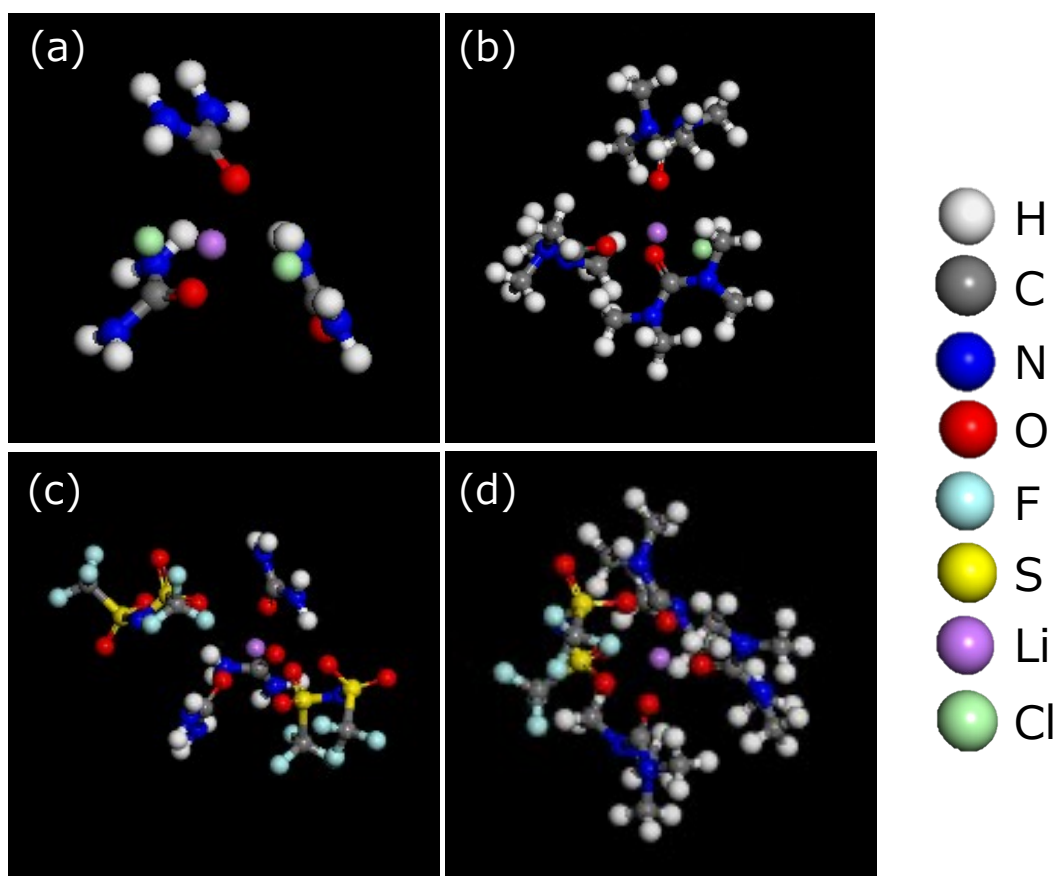

**Figure S9.** Typical coordination diagrams of molecules existing 3 Å from Li<sup>+</sup> center of (a) LiCl:Urea = 1:5 mol%, (b) LiCl:Tetramethylurea = 1:5 mol%, (c) LiTFSI:Urea = 1:5 mol%, and (d) LiTFSI:Tetramethylurea = 1:5 mol%.
